# Supplementary material
Source: PubMed Central journal article supplement (PMC2714992)

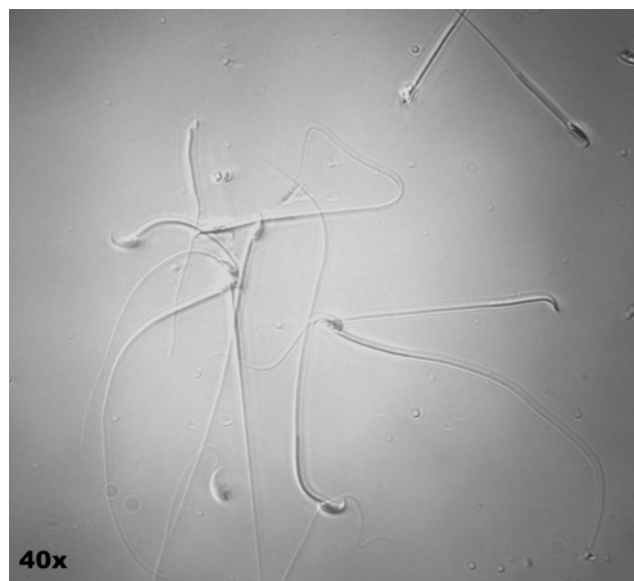

**Supplemental FIG. 1, Wilkerson, et al**

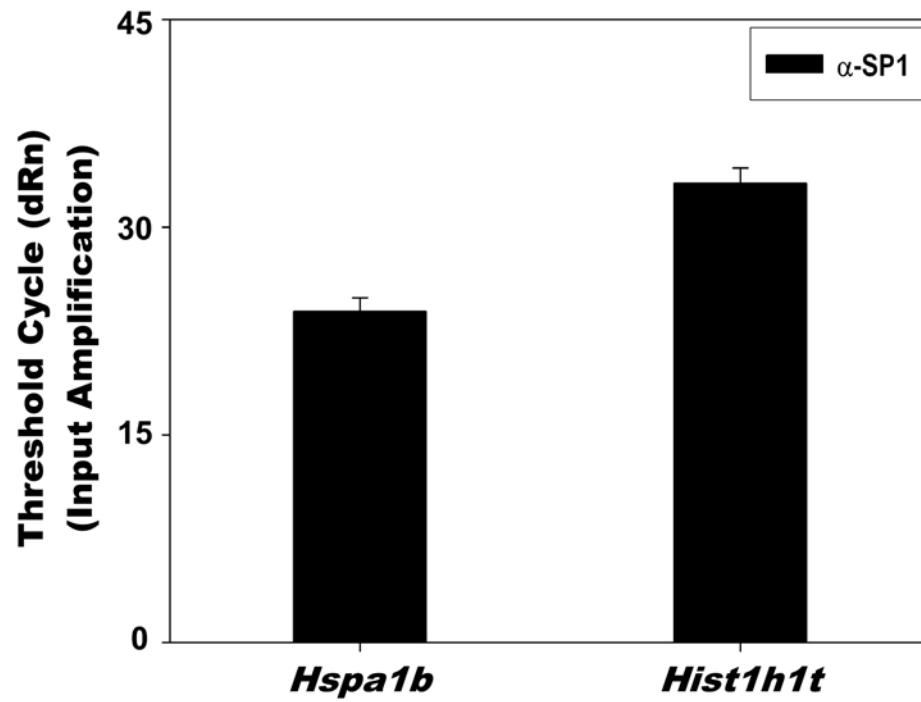

Supplemental FIG. 2, Wilkerson, et al

Supplement: supp_107.066241_biolreprod.107.066241-1.pdf [file supp_107.066241_biolreprod.107.066241-1.pdf]
